# Supplementary material for: Comparative Transcriptome Profiling Reveals Changes of microRNAs Response to Exercise in Rats with Neuropathic Pain
Source: Neural Plast. 2021 Aug 2;2021:5597139. doi: 10.1155/2021/5597139 (PMC8356008; doi:10.1155/2021/5597139)
Supplement: Supplementary Materials — Table S1: sequencing data quality summary of microRNAs (miRNAs). Table S2: sequencing data quality summary of mRNAs. [file 5597139.f1.zip]

Archive with 2 entries (2 files):
- Table S1.docx
- Table S2 .docx
